# Supplementary material for: Fundamental crystal field excitations in magnetic semiconductor SnO2: Mn, Fe, Co, Ni
Source: Royal Society of Chemistry journal article supplement (doi:10.1039/c9cp01516g), 2019-01-01
Supplement: c9cp01516g1.pdf [file c9cp01516g1.pdf]

Supplemental Material for “*Fundamental Crystal Field  
Excitations in Magnetic Semiconductor SnO<sub>2</sub>:Mn,Fe,Co,Ni*”

B. Leedahl,<sup>1</sup> D. J. McCloskey,<sup>1</sup> D. W. Boukhvalov,<sup>2,3</sup> I. S. Zhidkov,<sup>3</sup> A. I. Kukhareenko,<sup>3</sup> E.  
Z. Kurmaev,<sup>3,4</sup> S. O. Cholakh,<sup>3</sup> N. V. Gavrilov,<sup>5</sup> V. I. Brinzari,<sup>6</sup> and A. Moewes<sup>1</sup>

<sup>1</sup>*Department of Physics and Engineering Physics,  
University of Saskatchewan, 116 Science Place,  
Saskatoon, Saskatchewan S7N 5E2, Canada\**

<sup>2</sup>*College of Science, Institute of Materials Physics and Chemistry,  
Nanjing Forestry University, Nanjing 210037, P. R. China*

<sup>3</sup>*Institute of Physics and Technology, Ural Federal University,  
Mira 9 str., 620002 Yekaterinburg, Russia*

<sup>4</sup>*M.N. Mikheev Institute of Metal Physics of Ural Branch of Russian Academy of Sciences,  
S. Kovalevskoi 18 str., 620990 Yekaterinburg, Russia*

<sup>5</sup>*Institute of Electrophysics, Russian Academy of Sciences,  
Ural Branch, 620990 Yekaterinburg, Russia*

<sup>6</sup>*Pokatilov Laboratory of Physics and Engineering of Nanomaterials,  
Department of Theoretical Physics, Moldova State University,  
Chisinau MD-2009, Republic of Moldova*

|    | Ox. State. | $10Dq$ | $Ds$  | $Dt$ | $\beta$ |
|----|------------|--------|-------|------|---------|
| Mn | 2+         | 0.65   | 0     | 0    | 0.2     |
| Fe | 2+         | 1.0    | 0     | 0    | 0.5     |
| Fe | 3+         | 1.5    | 0     | 0    | 0.7     |
| Co | 2+         | 1.8    | -0.03 | 0.03 | 0.67    |
| Ni | 2+         | 1.55   | 0     | 0    | 0.5     |

TABLE S1. Shown are the crystal field parameters for the calculated XAS and RIXS spectra in Figures 2 and 3 of main manuscript. The units for  $10Dq$ ,  $Ds$ , and  $Dt$  are eV, while  $\beta$  is unitless and corresponds to the scaling of the interatomic Slater integrals.

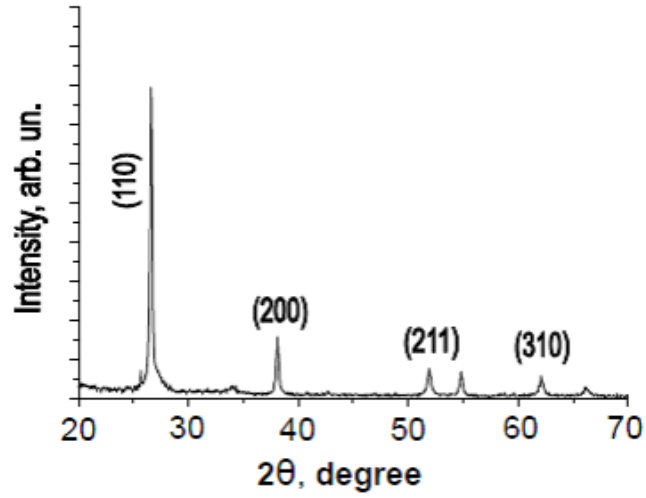

FIG. S1. XRD pattern of  $\text{SnO}_2$  undoped films (before implantation) deposited by spray pyrolysis.

$T_{\text{deposition}} = 450^\circ\text{C}$ . Film thickness  $\approx 100$  nm.

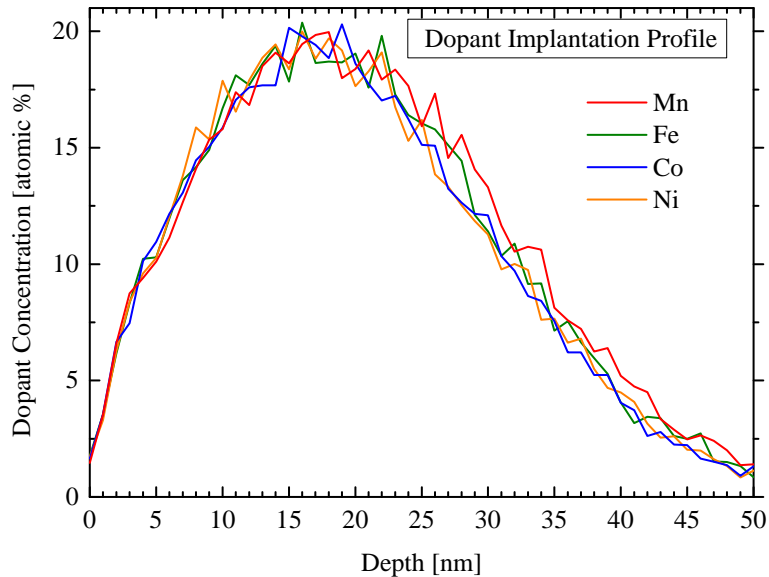

FIG. S2. Calculated dopant profile due to ion implantation. The absolute concentration was estimated using the XPS survey spectra which is sensitive to the first  $\approx 5$  nm. While the shape profile was estimated using SRIM software. As expected, there is no significant difference between dopants.
